# Supplementary material for: Proteomic analysis of phytase transgenic and non-transgenic maize seeds
Source: PubMed Central journal article supplement (PMC5569035; doi:10.1038/s41598-017-09557-8), 2017-08-23
Supplement: 41598_2017_9557_MOESM1_ESM.pdf [file 41598_2017_9557_MOESM1_ESM.pdf]

## Proteomic analysis of phytase transgenic and non-transgenic maize seeds

Yanhua Tan<sup>1,2</sup>, Zheng Tong<sup>1</sup>, Qian Yang<sup>1</sup>, Yong Sun<sup>1</sup>, Xiang Jin<sup>1</sup>,

Cunzhi Peng<sup>1</sup>, Anping Guo<sup>1,2\*</sup>, Xuchu Wang<sup>1,2\*</sup>

1. Key Laboratory of Biology and Genetic Resources for Tropical Crops, Institute of Tropical Biosciences and Biotechnology, Chinese Academy of Tropical Agricultural Sciences, Haikou, Hainan 571101, China
2. College of Agriculture, Hainan University, Haikou, Hainan 570228, China

\*Corresponding authors: Dr. Anping Guo and Dr. Xuchu Wang  
Chinese Academy of Tropical Agricultural Sciences  
Institute of Tropical Biosciences and Biotechnology  
Xueyuan Road, Longhua District, Haikou, Hainan 571101, China  
Tel.: +86 898 66987460.  
E-mail: [guoanping@itbb.org.cn](mailto:guoanping@itbb.org.cn); [xchwanghainan@163.com](mailto:xchwanghainan@163.com)

### Supporting Information File:

Supplementary Figure S1: The original 2-DE gels for maize seeds.

Supplementary Table S1: MS/MS identification information of DEPs obtained by 2-DE.

Supplementary Table S2: Identification information of DEPs obtained by iTRAQ.

Supplementary Table S3: GO numbers of 148 identified proteins.

Supplementary Table S4: Classification of COG of 148 identified DEPs.

Supplementary Table S5: KEGG pathway enrichment of identified DEPs.

Supplementary Table S6: Primers used in qRT-PCR

**Supplementary Figure S1: The typical original 2-DE gels for maize seeds.**

**NT- Repeat 1**

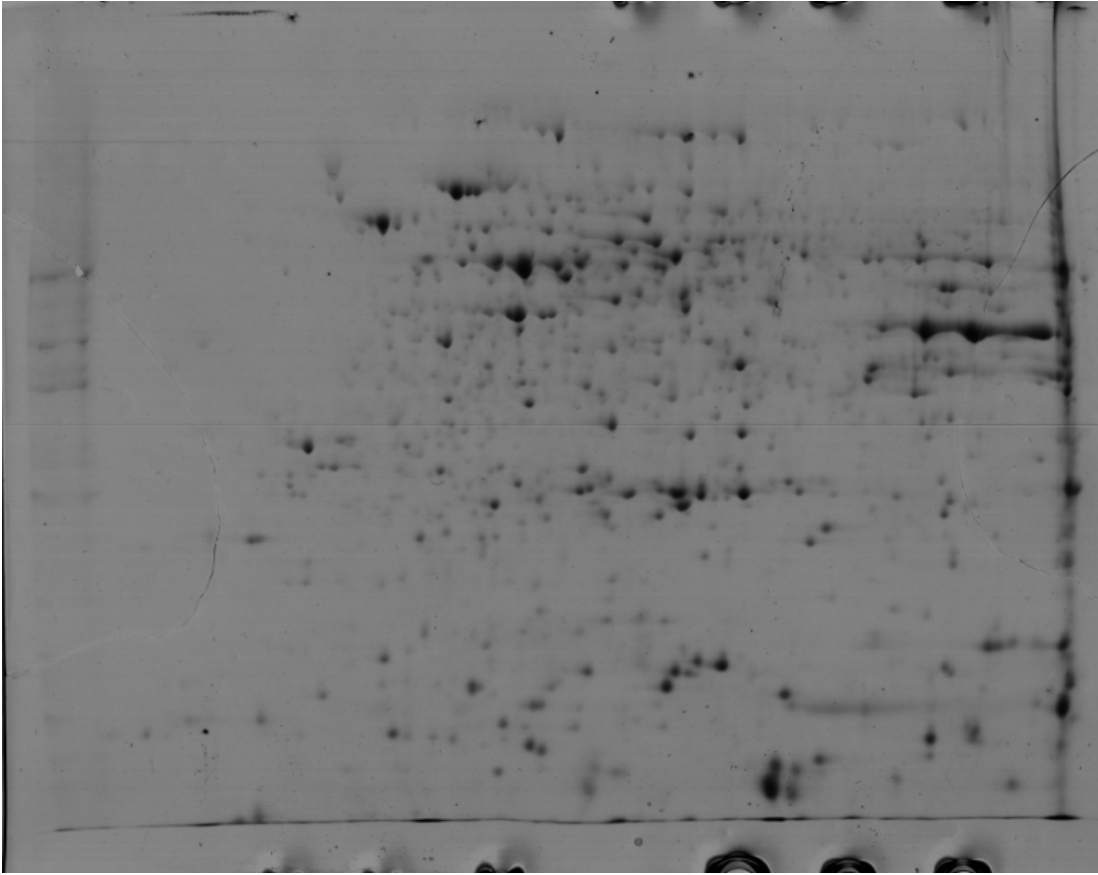

**PT-Repeat 1**

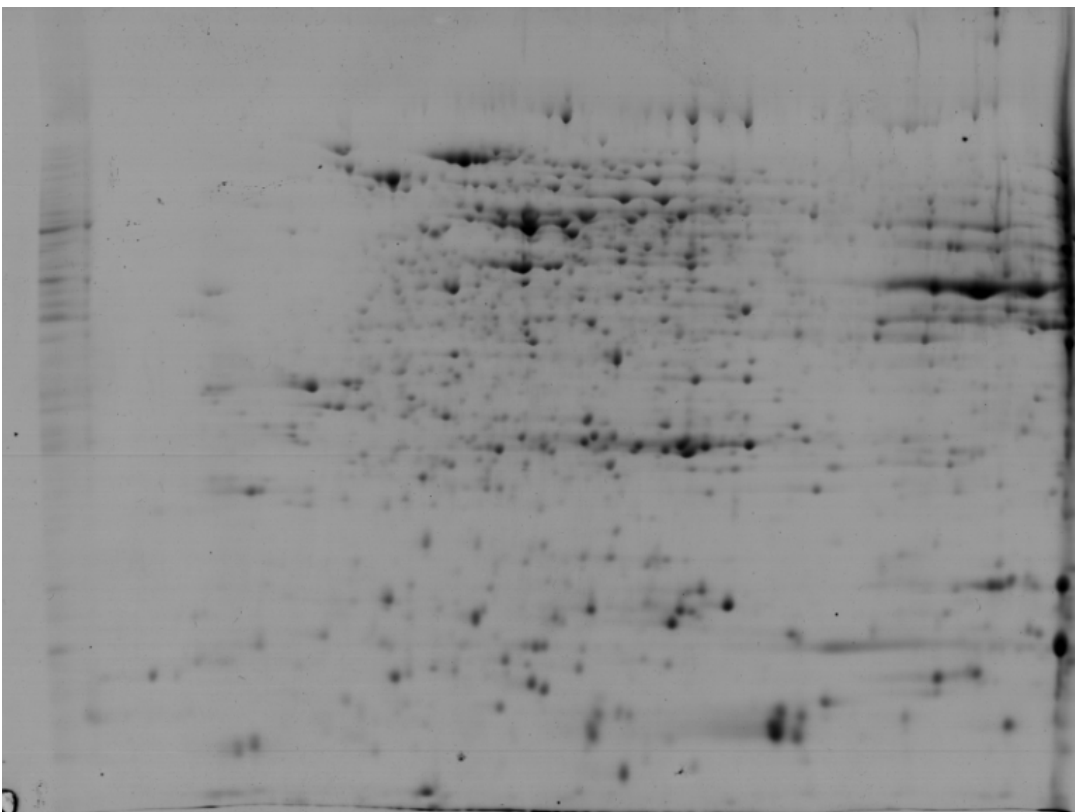

**NT- Repeat 2**

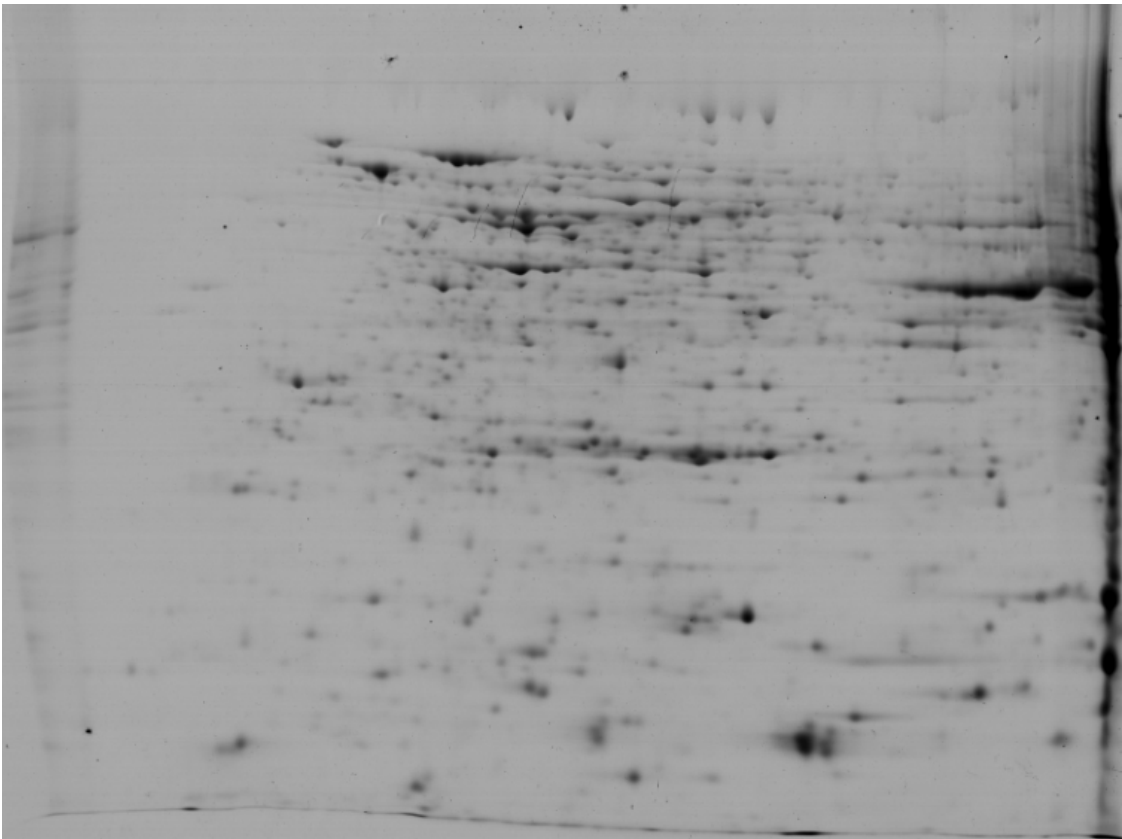

**PT- Repeat 2**

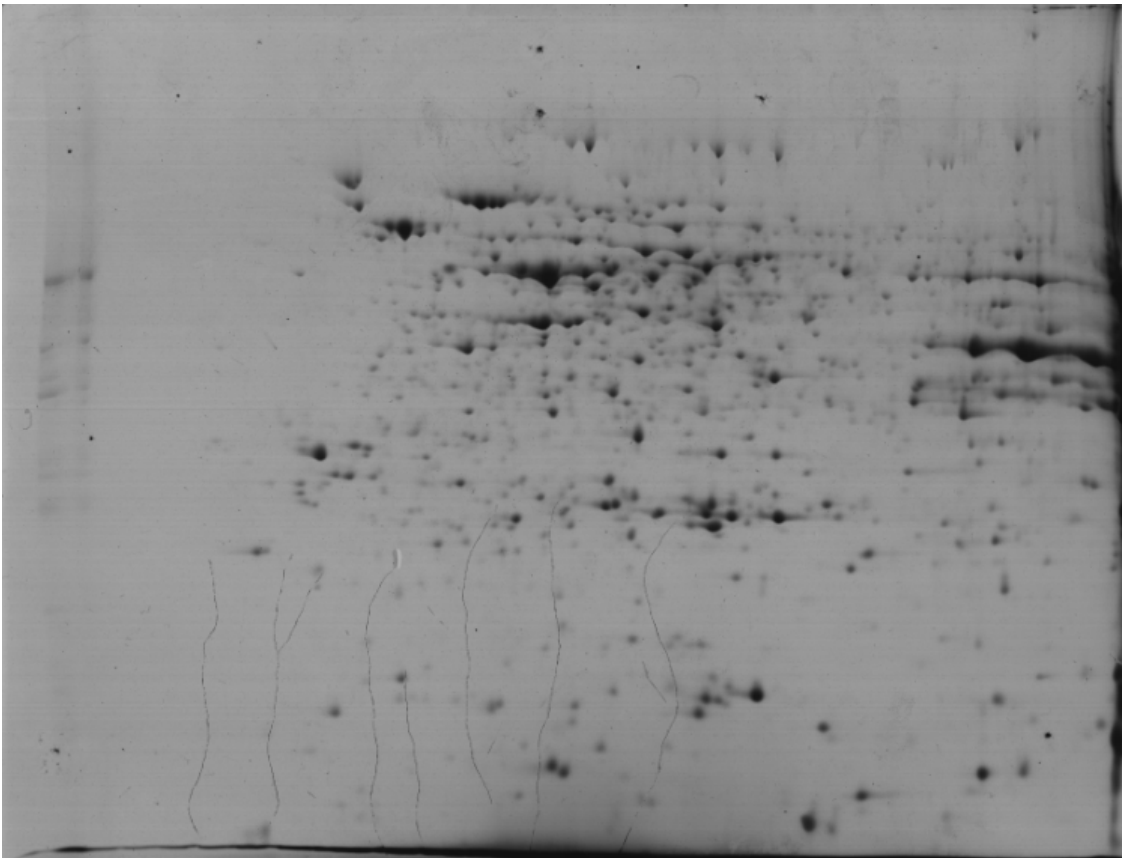

**NT- Repeat 3**

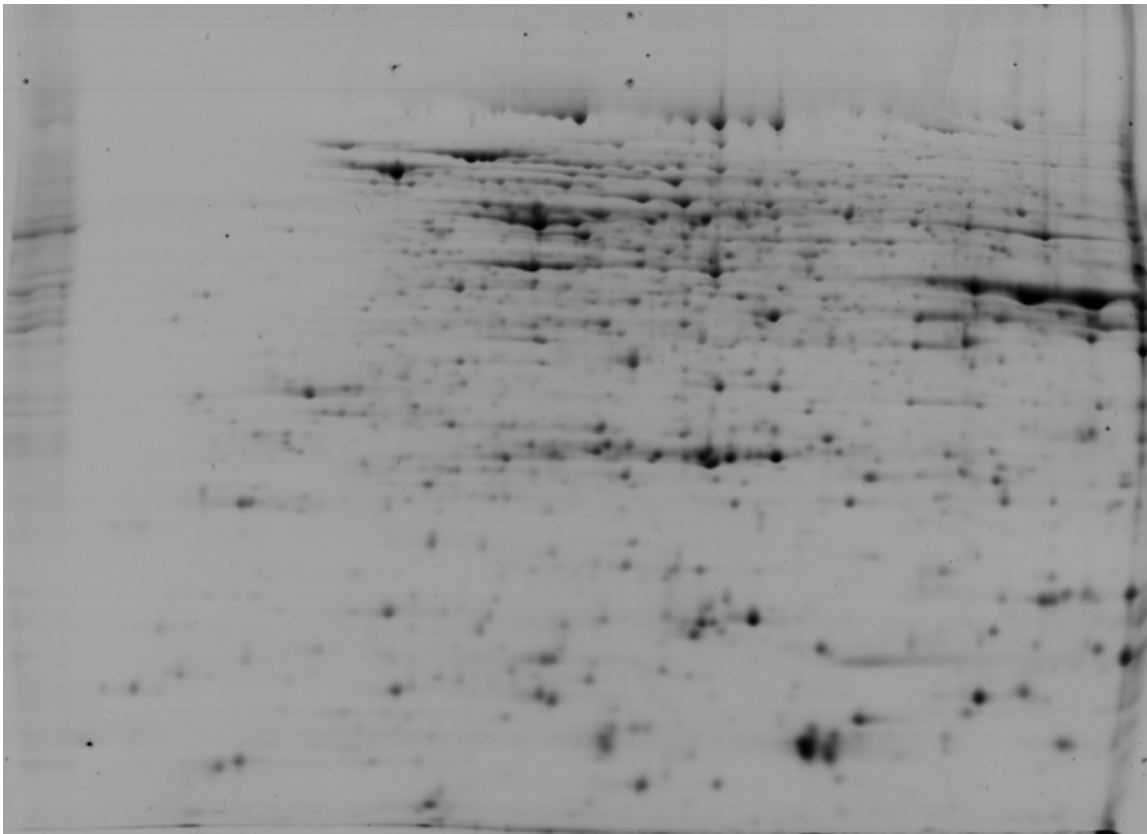

**PT- Repeat 3**

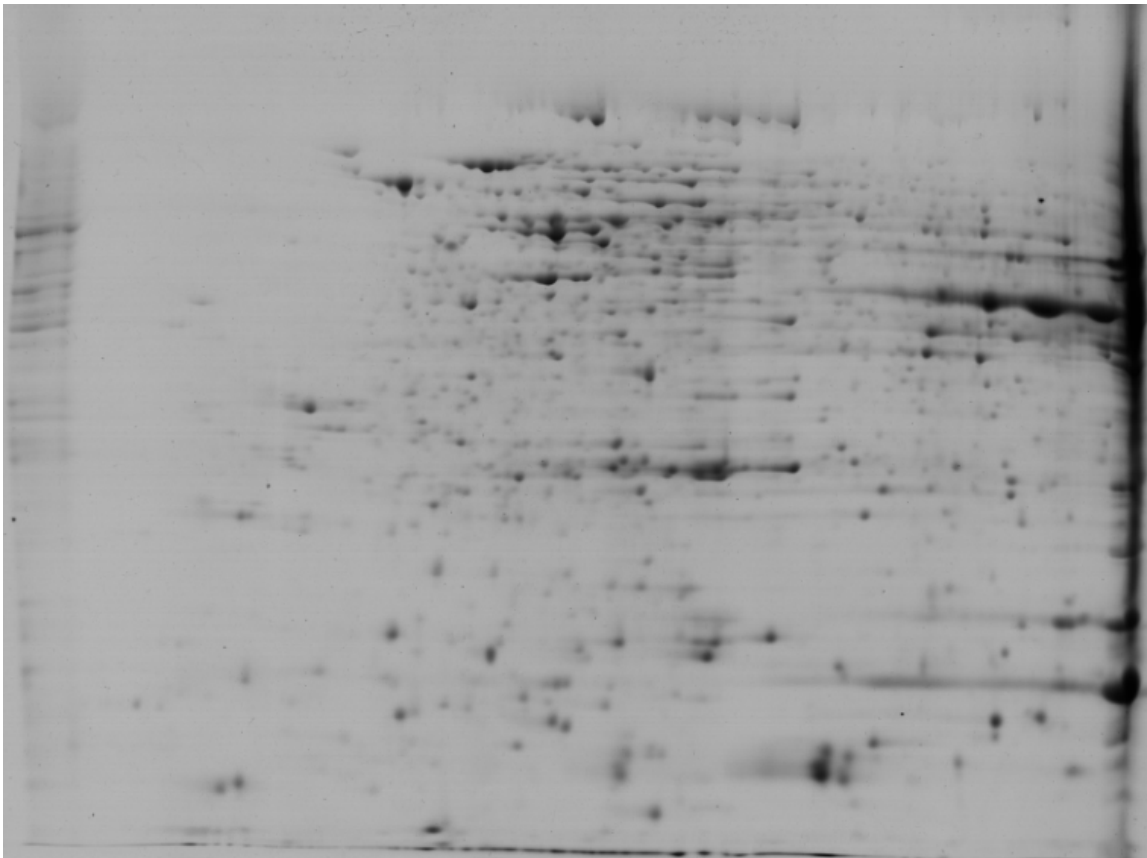

**Supplementary Table S1: MS/MS identification information of DEPs obtained by 2-DE.**

| Spots No | Ac. No       | Thero. PI/kDad | MP | Protein Score | Fold change | p value  | Protein Description                                        |
|----------|--------------|----------------|----|---------------|-------------|----------|------------------------------------------------------------|
| 1        | gi 293336560 | 5.47/60.42     | 5  | 591           | 1.56        | 1.5E-17  | phosphoglycerate mutase1                                   |
| 2        | gi 223974403 | 6.55/50.18     | 2  | 102           | 1.67        | 0.018    | unknown                                                    |
|          | gi 226533244 | 6.55/50.14     | 2  | 102           |             | 0.018    | transaminase/ transferase, transferring nitrogenous groups |
| 3        | gi 308080934 | 5.45/46.82     | 3  | 137           | 1.89        | 3.0E-04  | cytosolic monodehydroascorbate reductase                   |
| 4        | gi 226493582 | 5.33/38.69     | 5  | 198           | 1.51        | 8.3E-02  | uncharacterized protein LOC100285670                       |
|          | gi 226508732 | 5.38//39.01    | 3  | 124           |             | 0.075    | activator of 90 kDa heat shock protein ATPase              |
|          | gi 413921986 | 5.95/49.32     | 3  | 124           |             | 0.083    | activator of heat shock protein ATPase                     |
| 5        | gi 413918083 | 4.83/39.35     | 3  | 214           | 1.81        | 2.E-08   | eukaryotic translation initiation factor 3 subunit 3       |
|          | gi 226493027 | 4.83/39.42     | 3  | 214           |             | 2.E-08   | uncharacterized protein LOC100280503                       |
|          | gi 413918085 | 4.83/38.59     | 3  | 214           |             | 2.E-08   | hypothetical protein ZEAMMB73_519156                       |
|          | gi 670442963 | 4.83/39.23     | 3  | 214           |             | 2.E-08   | PREDICTED: LOC100280503 isoform X1                         |
| 6        | gi 162461501 | 6.41/36.63     | 5  | 520           | 2.04        | 5.5E-10  | glyceraldehyde-3-phosphate dehydrogenase 2, cytosolic      |
|          | gi 194700850 | 6.40/32.08     | 5  | 520           |             | 5.5E-10  | unknown                                                    |
|          | gi 413941770 | 6.67/37.27     | 5  | 520           |             | 5.5E-10  | glyceraldehyde-3-phosphate dehydrogenase2                  |
|          | gi 413921389 | 6.45/32.03     | 3  | 240           |             | 1.20E-08 | glyceraldehyde-3-phosphate dehydrogenase1 isoform 1        |
| 7        | gi 413916077 | 6.89/21.80     | 3  | 278           | 1.94        | 9.0E-11  | hypothetical protein ZEAMMB73_718489                       |
|          | gi 308080598 | 5.86/25.67     | 3  | 278           |             | 9.0E-11  | uncharacterized protein LOC100502283                       |
| 8        | gi 226532150 | 5.04/26.68     | 2  | 90            | 1.73        | 0.05     | isoamyl acetate-hydrolyzing esterase                       |
| 9        | gi 195605636 | 5.53/27.28     | 2  | 157           | 1.57        | 8.90E-06 | triosephosphate isomerase, cytosolic                       |
|          | gi 670440305 | 6.31/71.39     | 3  | 382           |             | 5.00E-11 | PREDICTED: globulin-1 S allele-like                        |
| 10       | gi 226498252 | 5.14/19.56     | 4  | 392           | 1.55        | 1.6E-11  | adenine phosphoribosyltransferase 1                        |
|          | gi 414877870 | 8.93/24.14     | 4  | 392           |             | 1.6E-11  | TPA: adenine phosphoribosyltransferase 1                   |
|          | gi 194701624 | 5.14/19.51     | 4  | 392           |             | 1.6E-11  | unknown                                                    |
| 11       | gi 413944599 | 5.38/18.20     | 3  | 180           | 1.61        | 1.3E-05  | USP family protein                                         |
|          | gi 212721114 | 5.63/18.30     | 3  | 180           |             | 1.3E-05  | uncharacterized protein LOC100194018                       |
| 12       | gi 413949326 | 6.04/103.78    | 4  | 84            | 0.66        | 0.34     | pyruvate, phosphate dikinase 1, Precursor                  |
| 13       | gi 413949326 | 6.04/103.78    | 11 | 487           | 0.53        | 2.2E-05  | pyruvate, phosphate dikinase 1, Precursor                  |
| 14       | gi 413949326 | 5.81/64.69     | 2  | 198           | 0.53        | 1.0E-09  | ruBisCO large subunit-binding protein subunit beta         |
|          | gi 226493641 | 5.81/64.52     | 2  | 198           |             | 1.0E-09  | ruBisCO large subunit-binding protein subunit beta         |
|          | gi 413926905 | 5.81/64.62     | 2  | 198           |             | 1.0E-09  | putative TCP-1/cpn60 chaperonin family protein isoform 1   |
| 15       | gi 189027076 | 6.16/57.89     | 7  | 740           | 0.52        | 1.9E-12  | glucose-1-phosphate adenyltransferase large subunit 1      |
| 16       | gi 217330650 | 5.29/42.16     | 3  | 233           | 0.66        | 7.2E-08  | actin related protein 1                                    |
| 17       | gi 169245755 | 5.25/39.57     | 2  | 186           | 0.64        | 9.1E-09  | glutamine synthetase                                       |
|          | gi 162463755 | 5.34/39.57     | 2  | 186           |             | 9.1E-09  | glutamine synthetase root isozyme 3                        |
| 18       | gi 194703858 | 5.50/39.20     | 4  | 157           | 0.59        | 0.0035   | gibberellin 20 oxidase 2                                   |

|    |              |            |   |     |      |         |                                             |
|----|--------------|------------|---|-----|------|---------|---------------------------------------------|
| 19 | gi 414586767 | 5.46/19.71 | 2 | 157 |      | 7.5E-06 | TPA: hypothetical protein ZEAMMB73_925834   |
|    | gi 162460084 | 5.25/34.66 | 2 | 157 | 0.54 | 7.5E-06 | L-galactose dehydrogenase                   |
| 20 | gi 226508112 | 6.97/41.84 | 3 | 194 | 0.66 | 8.3E-08 | cysteine synthase1                          |
| 21 | gi 219887709 | 6.77/40.13 | 5 | 293 | 0.62 | 2.9E-06 | unknown                                     |
| 22 | gi 195650645 | 6.16/32.83 | 4 | 401 | 0.49 | 6.7E-10 | carbonyl reductase 1                        |
| 23 | gi 224029461 | 5.08/28.96 | 2 | 184 | 0.66 | 4.9E-09 | 6-phosphogluconolactonase                   |
| 24 | gi 226504576 | 5.65/27.48 | 3 | 173 | 0.62 | 1.6E-04 | APx1 - Cytosolic Ascorbate Peroxidase       |
| 25 | gi 224029787 | 6.10/27.51 | 4 | 311 | 0.47 | 1.1E-07 | proteasome subunit alpha type               |
| 26 | gi 194704678 | 5.95/21.60 | 4 | 295 | 0.60 | 6.2E-07 | minor allergen Alt a 7                      |
| 27 | gi 4468794   | 5.96/23.87 | 5 | 408 | 0.53 | 2.2E-13 | glutathione transferase III(b)              |
| 28 | gi 195605616 | 4.53/18.79 | 5 | 327 | 0.54 | 1.9E-07 | translationally-controlled tumor protein    |
| 29 | gi 195605616 | 4.54/18.79 | 3 | 182 | 0.33 | 2.5E-04 | translationally-controlled tumor protein    |
| 30 | gi 226504982 | 8.34/21.74 | 2 | 110 | 0.66 | 5.5E-04 | eukaryotic translation initiation factor 1A |
| 31 | gi 840086919 | 6.30/16.53 | 2 | 153 | 0.65 | 1.0E-07 | nucleoside diphosphate kinase 1             |
| 32 | gi 266398    | 8.07/16.86 | 3 | 181 | 0.47 | 3.0E-04 | trypsin/factor XIIA inhibitor               |

Note: 1) Spots No is assigned spot numbers as indicated in Figure 2.

2) Best Protein Accession is according to UNIProt.

3) Thero.kDa and Thero. pI are the theoretical values of molecular weight (Mr., kDa) and pI for the identified proteins.

4) MP is the numbers of the matched peptides

5) Percent values of coverage (%) of the matched peptides in the whole protein sequence.

6) p value is the highest score's Expect of the matched peptides.

7) Fold change is the ratio of PT maize seeds compared to NT maize seeds.

**Supplementary Table S2: Identification information of DEPs obtained by iTRAQ.**

| <b>Protein No.</b> | <b>Unused Score</b> | <b>Cov. (95%)</b> | <b>Peptides (95%)</b> | <b>Fold (PT/NT)</b> | <b>p value</b> | <b>Accession</b>                   | <b>Name</b>                             |
|--------------------|---------------------|-------------------|-----------------------|---------------------|----------------|------------------------------------|-----------------------------------------|
| 33                 | 3.09                | 44.64             | 5                     | 0.045000<br>1       | 0.043<br>54    | tr A3KLI1 A3KLI1_MA<br>IZE         | RAB17 protein                           |
| 34                 | 16                  | 68.13             | 16                    | 0.067237<br>7       | 0.040<br>12    | tr B6SI37 B6SI37_MAI<br>ZE         | Embryonic abundant protein 1            |
| 35                 | 74.43               | 51.92             | 81                    | 0.094233<br>9       | 0.016<br>67    | tr C0PGM3 C0PGM3_<br>MAIZE         | Uncharacterized protein                 |
| 36                 | 32.89               | 57.5              | 25                    | 0.102399<br>9       | 0.010<br>05    | tr Q41815 Q41815_MAI<br>ZE         | Heat shock protein 26                   |
| 37                 | 61.65               | 60.44             | 118                   | 0.11171<br>99       | 0.010          | tr Q7M1Z8 Q7M1Z8_M<br>AIZE         | Globulin-2                              |
| 38                 | 30.63               | 61.66             | 243                   | 0.145216<br>6       | 0.002<br>3     | tr K7VJF3 K7VJF3_MA<br>IZE         | Uncharacterized protein                 |
| 39                 | 10.11               | 29.07             | 6                     | 0.152435<br>9       | 0.006<br>73    | tr B8QY31 B8QY31_ZE<br>AMP         | Zeamatin-like protein                   |
| 40                 | 17.79               | 18.83             | 12                    | 0.190091<br>17      | 0.004          | tr B6SLF6 B6SLF6_MA<br>IZE         | Antimicrobial peptide MBP-1             |
| 41                 | 6.17                | 40.74             | 12                    | 0.208429<br>8       | 0.033<br>46    | tr B6TLK8 B6TLK8_M<br>AIZE         | 17.4 kDa class I heat shock protein 3   |
| 42                 | 12                  | 62.83             | 9                     | 0.210916<br>5       | 0.024<br>05    | tr B6T8E4 B6T8E4_MA<br>IZE         | Embryonic abundant protein 1            |
| 43                 | 7.11                | 26.71             | 4                     | 0.214135<br>6       | 0.000<br>21    | tr B6SQM6 B6SQM6_<br>MAIZE         | Pathogenesis protein 10                 |
| 44                 | 46.84               | 38.57             | 57                    | 0.218984<br>5       | 0.026<br>33    | tr K7W272 K7W272_M<br>AIZE         | Uncharacterized protein                 |
| 45                 | 3.08                | 84.6              | 133                   | 0.219432<br>5       | 0.027<br>21    | tr Q4U168 Q4U168_MA<br>IZE         | Glucose-1-phosphate adenylyltransferase |
| 46                 | 20.01               | 21.69             | 12                    | 0.240035<br>7       | 0.039<br>1     | tr A0A096TN72 A0A09<br>6TN72_MAIZE | Uncharacterized protein                 |
| 47                 | 17.38               | 30.03             | 14                    | 0.245141<br>4       | 0.032<br>6     | tr B4FKP4 B4FKP4_M<br>AIZE         | Uncharacterized protein                 |
| 48                 | 75.08               | 59.21             | 88                    | 0.250743<br>5       | 0.025<br>44    | tr Q9S822 Q9S822_MAI<br>ZE         | Heat shock protein 101                  |
| 49                 | 17.66               | 35.71             | 9                     | 0.266474<br>6       | 0.016<br>18    | tr B6UGU4 B6UGU4_<br>MAIZE         | Steroleosin                             |
| 50                 | 7.08                | 38.98             | 5                     | 0.301911<br>7       | 0.004<br>68    | tr B6UGS5 B6UGS5_M<br>AIZE         | Putative uncharacterized protein        |
| 51                 | 22.07               | 50.42             | 22                    | 0.305629<br>9       | 0.010<br>59    | tr B4FFZ9 B4FFZ9_MA<br>IZE         | Lipoprotein                             |
| 52                 | 33.25               | 46.81             | 19                    | 0.318147<br>7       | 0.024<br>09    | tr Q8S532 Q8S532_MAI<br>ZE         | Cytosolic aldehyde dehydrogenase        |

|    |       |       |    |          |       |                            |             |             |                                            |
|----|-------|-------|----|----------|-------|----------------------------|-------------|-------------|--------------------------------------------|
| 53 | 10.02 | 35.43 | 11 | 0.318202 | 0.034 | tr C0P5U8 C0P5U8_MA<br>9   | 0.034<br>93 | IZE         | Glutathione S-transferase 4                |
| 54 | 36.75 | 45.21 | 29 | 0.324057 | 0.003 | tr B6SK46 B6SK46_MA<br>84  | 0.003<br>84 | IZE         | Cupin family protein                       |
| 55 | 18.9  | 47.33 | 23 | 0.325087 | 0.017 | tr C0P451 C0P451_MAI<br>3  | 0.017<br>58 | ZE          | Endochitinase B                            |
| 56 | 10.22 | 41.89 | 35 | 0.329906 | 0.010 | tr B6TSQ9 B6TSQ9_M<br>8    | 0.010<br>38 | AIZE        | Aspartic proteinase oryzasin-1             |
| 57 | 0.12  | 2.448 | 2  | 0.330878 | 0.035 | tr B6SSB8 B6SSB8_MA<br>5   | 0.035<br>03 | IZE         | Transposon protein                         |
| 58 | 8     | 49.21 | 4  | 0.331446 | 0.042 | tr K7WCU4 K7WCU4_<br>4     | 0.042<br>01 | MAIZE       | Uncharacterized protein                    |
| 59 | 28.25 | 78.17 | 29 | 0.334605 | 0.020 | tr B4FFK9 B4FFK9_M<br>4    | 0.020<br>4  | AIZE        | Uncharacterized protein                    |
| 60 | 12.19 | 59.09 | 27 | 0.341679 | 0.042 | tr C0PPC9 C0PPC9_MA<br>6   | 0.042<br>13 | IZE         | Uncharacterized protein                    |
| 61 | 26.79 | 65.58 | 21 | 0.345023 | 0.025 | tr Q19VG6 Q19VG6_M<br>1    | 0.025<br>13 | AIZE        | Major latex protein 22                     |
| 62 | 4.91  | 7.616 | 4  | 0.345319 | 0.033 | tr A0A096RYL4 A0A09<br>5   | 0.033<br>03 | 6RYL4_MAIZE | Uncharacterized protein                    |
| 63 | 7.53  | 15.96 | 5  | 0.351526 | 0.013 | tr K7V5N4 K7V5N4_M<br>9    | 0.013<br>56 | AIZE        | Uncharacterized protein                    |
| 64 | 2.7   | 60.24 | 65 | 0.352958 | 0.049 | tr E9NQE3 E9NQE3_M<br>9    | 0.049<br>9  | AIZE        | Malate dehydrogenase                       |
| 65 | 10.58 | 39.2  | 22 | 0.361260 | 0.028 | tr B6UGN9 B6UGN9_<br>6     | 0.028<br>39 | MAIZE       | Oleosin                                    |
| 66 | 40.12 | 59.56 | 24 | 0.363651 | 0.010 | tr B4F9K0 B4F9K0_MA<br>8   | 0.010<br>22 | IZE         | Uncharacterized protein                    |
| 67 | 6.55  | 21.17 | 9  | 0.364626 | 0.038 | tr B8A3K0 B8A3K0_M<br>4    | 0.038<br>97 | AIZE        | Uncharacterized protein                    |
| 68 | 13.44 | 73.24 | 11 | 0.373108 | 0.039 | tr B4FJM6 B4FJM6_M<br>3    | 0.039<br>43 | AIZE        | Uncharacterized protein                    |
| 69 | 8.26  | 70    | 9  | 0.373772 | 0.012 | tr A0A096RTN1 A0A09<br>5   | 0.012<br>97 | 6RTN1_MAIZE | Uncharacterized protein                    |
| 70 | 13.72 | 42.24 | 9  | 0.379674 | 0.049 | tr B6U9I3 B6U9I3_MAI<br>38 | 0.049<br>38 | ZE          | Eukaryotic translation initiation factor 3 |
| 71 | 26.06 | 52.88 | 19 | 0.397955 | 0.033 | tr B4G1C2 B4G1C2_M<br>3    | 0.033<br>14 | AIZE        | Uncharacterized protein                    |
| 72 | 6.01  | 15.74 | 5  | 0.399932 | 0.007 | tr B6SGN7 B6SGN7_M<br>1    | 0.007<br>82 | AIZE        | Embryonic protein                          |
| 73 | 14.84 | 47.13 | 11 | 0.416975 | 0.005 | tr B6TTP4 B6TTP4_MA<br>5   | 0.005<br>45 | IZE         | Stress-inducible membrane pore protein     |
| 74 | 23.87 | 39.18 | 16 | 0.422440 | 0.022 | tr K7UTW6 K7UTW6_<br>8     | 0.022<br>45 | MAIZE       | Plasminogen activator inhibitor            |



|    |       |       |    |          |       |                                |       |                                                     |
|----|-------|-------|----|----------|-------|--------------------------------|-------|-----------------------------------------------------|
| 75 | 6     | 22.88 | 4  | 0.430430 | 0.030 | tr B6UDH8 B6UDH8_8             | MAIZE | Putative uncharacterized protein                    |
| 76 | 50.92 | 54.88 | 65 | 0.432737 | 0.021 | tr Q8S4W8 Q8S4W8_M1            | AIZE  | Pyruvate decarboxylase                              |
| 77 | 48.24 | 59.84 | 44 | 0.444518 | 0.028 | tr B4FAL8 B4FAL8_M1            | AIZE  | Uncharacterized protein                             |
| 78 | 6.38  | 12.53 | 4  | 0.461243 | 0.019 | tr B6TII3 B6TII3_MAIZ3         | E     | ADP-ribosylation factor GTPase-activating protein 3 |
| 79 | 6     | 26.32 | 6  | 0.461747 | 0.016 | tr B6TKN6 B6TKN6_M9            | AIZE  | Nonspecific lipid-transfer protein                  |
| 80 | 15.89 | 53.17 | 34 | 0.466296 | 0.036 | tr B6TF92 B6TF92_MA61          | IZE   | Stress responsive protein                           |
| 81 | 15.33 | 23.06 | 10 | 0.466692 | 0.032 | tr C0HFV7 C0HFV7_M4            | AIZE  | Putative apyrase family protein                     |
| 82 | 1.87  | 4.021 | 3  | 0.476355 | 0.025 | tr B8A0H4 B8A0H4_M3            | AIZE  | Uncharacterized protein                             |
| 83 | 10.01 | 36.84 | 9  | 0.483058 | 0.041 | tr B4F9E8 B4F9E8_MA7           | IZE   | Uncharacterized protein                             |
| 84 | 0.18  | 17.13 | 18 | 0.492498 | 0.015 | tr A0A096SBR2 A0A096SBR2_MAIZE |       | Uncharacterized protein                             |
| 85 | 1.02  | 42.53 | 4  | 0.500184 | 0.025 | tr K7TQT5 K7TQT5_M7            | AIZE  | Uncharacterized protein                             |
| 86 | 7.14  | 10.76 | 7  | 0.506318 | 0.005 | tr K7V5M7 K7V5M7_4             | MAIZE | Uncharacterized protein                             |
| 87 | 2     | 7.659 | 2  | 0.508617 | 0.002 | tr A0A096RDK8 A0A096RDK8_MAIZE |       | Uncharacterized protein                             |
| 88 | 41.5  | 78.22 | 30 | 0.519775 | 0.033 | tr C0HFQ1 C0HFQ1_M5            | AIZE  | Uncharacterized protein                             |
| 89 | 14.24 | 25.87 | 9  | 0.519907 | 0.024 | tr A0A096TAP2 A0A096TAP2_MAIZE |       | Uncharacterized protein                             |
| 90 | 87.32 | 48.67 | 69 | 0.524785 | 0.012 | tr K7VD78 K7VD78_M2            | AIZE  | Putative chaperone clbp family protein              |
| 91 | 10.67 | 24.93 | 7  | 0.527738 | 0.014 | tr B6UHC9 B6UHC9_M7            | AIZE  | Putative uncharacterized protein                    |
| 92 | 18.89 | 42.91 | 11 | 0.544157 | 0.037 | tr B4FRD1 B4FRD1_M6            | AIZE  | Adaptin ear-binding coat-associated protein 1       |
| 93 | 19.45 | 46.82 | 13 | 0.551989 | 0.026 | tr B6THJ5 B6THJ5_MA1           | IZE   | Phosphosulfolactate synthase-related protein        |
| 94 | 4.61  | 18.31 | 5  | 0.553265 | 0.006 | tr B6UGM9 B6UGM9_3             | MAIZE | Putative uncharacterized protein                    |
| 95 | 5.89  | 12.61 | 7  | 0.553520 | 0.012 | tr A0A096TH62 A0A096TH62_MAIZE |       | Uncharacterized protein                             |
| 96 | 5.82  | 23.1  | 8  | 0.555698 | 0.041 | tr C0HI30 C0HI30_MAI6          | ZE    | Uncharacterized protein                             |

|     |       |       |    |          |       |                                |                                                  |
|-----|-------|-------|----|----------|-------|--------------------------------|--------------------------------------------------|
| 97  | 4.05  | 3.289 | 3  | 0.558307 | 0.031 | tr A0A096QKY4 A0A096QKY4_MAIZE | Uncharacterized protein                          |
| 98  | 2.06  | 28.02 | 12 | 0.561774 | 0.002 | tr B4FL64 B4FL64_MAIZE         | Ribosomal protein L19                            |
| 99  | 81.97 | 55.44 | 61 | 0.564937 | 0.029 | tr Q9AXG8 Q9AXG8_MAIZE         | Lipoxygenase                                     |
| 100 | 4.09  | 7.818 | 2  | 0.568327 | 0.004 | tr B6TRW7 B6TRW7_MAIZE         | Sigma factor sigB regulation protein rsbQ        |
| 101 | 11.01 | 21.19 | 9  | 0.578298 | 0.000 | tr B4G0U5 B4G0U5_MAIZE         | Uncharacterized protein                          |
| 102 | 3.18  | 9.502 | 4  | 0.580278 | 0.015 | tr B6TA85 B6TA85_MAIZE         | Protein binding protein                          |
| 103 | 25.61 | 25.79 | 20 | 0.590458 | 0.014 | tr A0A096SXV7 A0A096SXV7_MAIZE | Uncharacterized protein                          |
| 104 | 0.29  | 2.361 | 2  | 0.594147 | 0.039 | tr A0A096PME5 A0A096PME5_MAIZE | Uncharacterized protein                          |
| 105 | 9.97  | 25.37 | 6  | 0.595445 | 0.044 | tr B7ZZM7 B7ZZM7_MAIZE         | Uncharacterized protein                          |
| 106 | 37.55 | 34.18 | 25 | 0.597541 | 0.006 | tr A0A096QF11 A0A096QF11_MAIZE | Uncharacterized protein                          |
| 107 | 14.11 | 9.063 | 8  | 0.606014 | 0.000 | tr A0A096TMH0 A0A096TMH0_MAIZE | Uncharacterized protein                          |
| 108 | 12.26 | 13.43 | 13 | 0.611000 | 0.007 | tr A0A096QBA0 A0A096QBA0_MAIZE | Uncharacterized protein                          |
| 109 | 22.26 | 44.65 | 16 | 0.611933 | 0.029 | tr C0PF66 C0PF66_MAIZE         | Aminoacylase-1                                   |
| 110 | 23.53 | 36.49 | 14 | 0.622543 | 0.047 | tr B4FEU5 B4FEU5_MAIZE         | Uncharacterized protein                          |
| 111 | 17.28 | 57.35 | 13 | 0.625172 | 0.008 | tr B6U8P6 B6U8P6_MAIZE         | ABA-responsive protein                           |
| 112 | 2.04  | 24.45 | 7  | 0.635782 | 0.040 | tr B4FSU1 B4FSU1_MAIZE         | Transmembrane emp24 domain-containing protein 10 |
| 113 | 39.54 | 39.72 | 21 | 0.636687 | 0.032 | tr Q5G1U0 Q5G1U0_MAIZE         | Malic enzyme                                     |
| 114 | 87.46 | 54.14 | 87 | 0.639226 | 0.035 | tr B6SV64 B6SV64_MAIZE         | Heat shock 70 kDa protein 4                      |
| 115 | 21.81 | 32.3  | 24 | 0.644807 | 0.035 | tr B4G1G1 B4G1G1_MAIZE         | Desiccation-related protein                      |
| 116 | 12.98 | 26.63 | 7  | 0.645797 | 0.023 | tr B6SMK8 B6SMK8_MAIZE         | Inositol-1-monophosphatase                       |
| 117 | 4.02  | 7.2   | 2  | 0.656096 | 0.011 | tr A0A096THV6 A0A096THV6_MAIZE | Uncharacterized protein                          |
| 118 | 17.23 | 48.22 | 11 | 1.518215 | 0.006 | tr B6T346 B6T346_MAIZE         | THO complex subunit 4                            |

|     |       |       |     |               |             |                                    |                                             |
|-----|-------|-------|-----|---------------|-------------|------------------------------------|---------------------------------------------|
| 119 | 13.43 | 14.39 | 9   | 1.525494<br>7 | 0.032<br>81 | tr K7TNE7 K7TNE7_M<br>AIZE         | Uncharacterized protein                     |
| 120 | 16.15 | 48.24 | 12  | 1.534568      | 0.019<br>38 | tr B4G1B0 B4G1B0_M<br>AIZE         | Remorin                                     |
| 121 | 2.04  | 8.285 | 4   | 1.548275<br>3 | 0.041<br>45 | tr Q32SG1 Q32SG1_M<br>AIZE         | Protein phosphatase 2A regulatory subunit B |
| 122 | 2     | 35.19 | 23  | 1.553396<br>9 | 0.002<br>37 | tr B4FBP3 B4FBP3_MA<br>IZE         | Signal recognition particle subunit SRP68   |
| 123 | 31.92 | 48.31 | 21  | 1.561641      | 0.027<br>69 | tr B4FU39 B4FU39_MA<br>IZE         | Uncharacterized protein                     |
| 124 | 2     | 10.64 | 4   | 1.567968<br>4 | 0.026<br>55 | tr K7UYP8 K7UYP8_M<br>AIZE         | Basic endochitinase A                       |
| 125 | 2.29  | 20.33 | 4   | 1.568320<br>7 | 0.022<br>47 | tr B6SX73 B6SX73_MA<br>IZE         | 60S ribosomal protein L35                   |
| 126 | 26.98 | 64.46 | 15  | 1.576059<br>2 | 0.025<br>78 | tr B4F957 B4F957_MAI<br>ZE         | Uncharacterized protein                     |
| 127 | 52.67 | 28.18 | 35  | 1.582744<br>3 | 0.028<br>44 | tr K7U005 K7U005_MA<br>IZE         | Uncharacterized protein                     |
| 128 | 18.95 | 42.58 | 18  | 1.615043<br>5 | 0.039<br>52 | tr B6UHH9 B6UHH9_M<br>AIZE         | 60S ribosomal protein L23a                  |
| 129 | 25.26 | 42.58 | 38  | 1.641585<br>8 | 0.036<br>79 | tr B4FSQ4 B4FSQ4_M<br>AIZE         | 40S ribosomal protein SA                    |
| 130 | 1.31  | 29.25 | 8   | 1.646408<br>1 | 0.004<br>03 | tr B6TA79 B6TA79_M<br>AIZE         | Cell division control protein 2             |
| 131 | 38.98 | 50.78 | 34  | 1.695722<br>1 | 0.037<br>59 | tr A0A096QRB1 A0A09<br>6QRB1_MAIZE | Uncharacterized protein                     |
| 132 | 27.05 | 69.49 | 271 | 1.695815<br>9 | 0.029<br>05 | tr B7ZZ42 B7ZZ42_MA<br>IZE         | Uncharacterized protein                     |
| 133 | 60.92 | 56.5  | 91  | 1.720119<br>1 | 0.013<br>06 | tr Q6R987 Q6R987_MA<br>IZE         | ATP synthase subunit alpha                  |
| 134 | 14.15 | 70.27 | 8   | 1.729688<br>3 | 0.036<br>88 | tr B6SMY5 B6SMY5_<br>MAIZE         | Putative uncharacterized protein            |
| 135 | 30.84 | 60.98 | 27  | 1.758488<br>2 | 0.033<br>62 | tr B4F848 B4F848_MAI<br>ZE         | Chaperonin                                  |
| 136 | 37.4  | 37.79 | 21  | 1.769358<br>8 | 0.046<br>81 | tr K7U1M0 K7U1M0_<br>MAIZE         | Uncharacterized protein                     |
| 137 | 3.25  | 9.626 | 2   | 1.777826<br>3 | 0.040<br>74 | tr B6T6D7 B6T6D7_M<br>AIZE         | MIR-interacting saposin-like protein        |
| 138 | 10.02 | 57.69 | 9   | 1.778223<br>1 | 0.014<br>23 | tr B6SIF0 B6SIF0_MAI<br>ZE         | Glycine-rich RNA-binding protein 2          |
| 139 | 17.09 | 37.04 | 11  | 1.906430<br>6 | 0.039<br>86 | tr B6T9E1 B6T9E1_MA<br>IZE         | Xyloglucan endotransglucosylase/hydrolase   |
| 140 | 13.97 | 48.44 | 8   | 1.93203       | 0.009<br>01 | tr B4FTE1 B4FTE1_MA<br>IZE         | Signal peptidase complex subunit 2          |

|     |       |       |    |          |       |                                |                                       |
|-----|-------|-------|----|----------|-------|--------------------------------|---------------------------------------|
| 141 | 12.11 | 11.51 | 9  | 1.946139 | 0.000 | tr A0A096QQ54 A0A096QQ54_MAIZE | Uncharacterized protein               |
| 142 | 5.11  | 25.98 | 5  | 1.972951 | 0.030 | tr B6SIP0 B6SIP0_MAIZE         | NHP2-like protein 1                   |
| 143 | 20.56 | 39.83 | 15 | 1.976405 | 0.049 | tr P93852 P93852_MAIZE         | Cycloartenol-C-24-methyltransferase 1 |
| 144 | 14.54 | 32.37 | 9  | 1.991969 | 0.011 | tr A0A096RS97 A0A096RS97_MAIZE | Uncharacterized protein               |
| 145 | 14.04 | 33.21 | 8  | 2.033743 | 0.001 | tr K7VTU7 K7VTU7_MAIZE         | Uncharacterized protein               |
| 146 | 8.6   | 45.35 | 18 | 2.088233 | 0.013 | tr Q9ZQX9 Q9ZQX9_MAIZE         | 40S ribosomal protein S27             |
| 147 | 19.26 | 32.78 | 15 | 4.092953 | 0.012 | tr B6UD26 B6UD26_MAIZE         | O-methyltransferase ZRP4              |
| 148 | 10    | 18.22 | 6  | 9.260415 | 0.033 | tr C4J5L2 C4J5L2_MAIZE         | Uncharacterized protein               |

**Note:**

- 1) Protein Number is followed the spot numbers as showed in Table S1.
- 2) Best Protein Accession is according to UNIProt.
- 3) MP is the numbers of the matched peptides
- 4) Percent values of coverage (%) of the matched peptides in the whole protein sequence.

**Supplementary Table S3: GO numbers of the 148 identified proteins.**

|            |            |            |            |            |            |            |
|------------|------------|------------|------------|------------|------------|------------|
| Q9AXG8     | GO:0050832 | GO:0002215 | GO:0046872 | GO:0016702 | GO:0031408 |            |
| B6T9E1     | GO:0048046 | GO:0005618 | GO:0042546 | GO:0071555 | GO:0004553 | GO:0010411 |
| A0A096SXV7 | GO:0004559 | GO:0030246 | GO:0006013 | GO:0008270 |            |            |
| Q6R987     | GO:0005524 | GO:0015991 | GO:0015986 | GO:0005739 | GO:0046933 | GO:0045261 |
| Q5G1U0     | GO:0051287 | GO:0004471 | GO:0006108 | GO:0046872 |            |            |
| P93852     | GO:0006084 | GO:0016132 | GO:0042398 | GO:0009805 | GO:0009793 | GO:0005783 |
| C0PF66     | GO:0004046 | GO:0006520 | GO:0005737 | GO:0046872 | GO:0008237 |            |
| Q9ZTQ4     | GO:0005975 | GO:0004575 |            |            |            |            |
| A0A096TAP2 | GO:0004185 |            |            |            |            |            |
| E9NQE3     | GO:0030060 | GO:0005975 | GO:0006108 | GO:0006099 |            |            |
| B4FSQ4     | GO:0022627 | GO:0000028 | GO:0003735 | GO:0006412 |            |            |
| Q9S822     | GO:0005524 | GO:0019538 |            |            |            |            |
| B6U9I3     | GO:0016282 | GO:0033290 | GO:0005852 | GO:0001731 | GO:0006446 | GO:0003743 |
| B4FBP3     | GO:0008312 | GO:0006614 | GO:0030942 | GO:0005047 | GO:0005786 |            |
| B6UGN9     | GO:0016021 | GO:0012511 |            |            |            |            |
| Q9ZQX9     | GO:0046872 | GO:0005840 | GO:0003735 | GO:0006412 |            |            |
| Q32SG1     | GO:0000159 | GO:0008601 | GO:0007165 |            |            |            |
| A0A096QF11 | GO:0009738 | GO:0005622 | GO:0035556 | GO:0019243 | GO:0010583 | GO:0009723 |
| B6TSQ9     | GO:0004190 | GO:0006629 |            |            |            |            |
| B4FSU1     | GO:0016021 | GO:0006810 |            |            |            |            |
| K7VD78     | GO:0005524 | GO:0005737 | GO:0016485 | GO:0009408 |            |            |
| B4FL64     | GO:0005840 |            |            |            |            |            |

|            |            |            |            |            |            |            |
|------------|------------|------------|------------|------------|------------|------------|
|            |            | GO:0003735 | GO:0006412 |            |            |            |
| B6THJ5     | GO:0003824 | GO:0019295 | GO:0010286 | GO:0010608 | GO:0006457 | GO:0009644 |
| A0A096RS97 | GO:0046872 | GO:0016491 |            |            |            |            |
| B6SSB8     | GO:0020037 | GO:0005506 | GO:0004497 | GO:0016705 |            |            |
| K7TNE7     | GO:0000911 | GO:0000226 | GO:0005643 | GO:0006611 | GO:0009627 |            |
| P15590     | GO:0045735 |            |            |            |            |            |
| P31927     | GO:0005986 | GO:0016157 | GO:0046524 |            |            |            |
| M7ZGS7     | GO:0016811 |            |            |            |            |            |
| Q94J20     |            |            |            |            |            |            |
| B6SIP0     | GO:0003723 | GO:0030529 | GO:0005730 | GO:0042254 |            |            |
| B6SX73     | GO:0005840 | GO:0003735 | GO:0006412 |            |            |            |
| B4F922     | GO:0010143 | GO:0051179 | GO:0016747 | GO:0010090 |            |            |
| Q19VG6     | GO:0006952 | GO:0009607 |            |            |            |            |
| K7W272     | GO:0045735 |            |            |            |            |            |
| B6SQM6     | GO:0006952 | GO:0009607 |            |            |            |            |
| B8A0H4     |            |            |            |            |            |            |
| B4FU39     | GO:0016491 | GO:0008270 |            |            |            |            |
| B4FRD1     | GO:0006897 | GO:0016020 |            |            |            |            |
| B4F848     | GO:0005524 | GO:0005737 | GO:0006457 |            |            |            |
| B6TA85     |            |            |            |            |            |            |
| B4F957     |            |            |            |            |            |            |
| B6T6D7     | GO:0034976 | GO:0009627 |            |            |            |            |
| B6TA79     | GO:0005524 | GO:0051301 | GO:0004672 |            |            |            |
| B6SLF6     | GO:0050832 |            |            |            |            |            |
| B6TII3     | GO:0005096 |            |            |            |            |            |
| B6T8E4     |            |            |            |            |            |            |

|            |            |            |            |            |            |
|------------|------------|------------|------------|------------|------------|
| B6SGN7     |            |            |            |            |            |
| A3KLI1     | GO:0006950 | GO:0009415 |            |            |            |
| B4G1C2     | GO:0005975 | GO:0004553 |            |            |            |
| B4FGK8     | GO:0005850 | GO:0003743 |            |            |            |
| K7UTW6     |            |            |            |            |            |
| C0P5U8     | GO:0016740 |            |            |            |            |
| B6UHI9     | GO:0000166 | GO:0005840 | GO:0003735 | GO:0006412 |            |
| Q41815     | GO:0010286 | GO:0006457 |            |            |            |
| B6TTP4     | GO:0016021 |            |            |            |            |
| K7UY8      | GO:0005975 | GO:0016998 | GO:0008061 | GO:0006032 | GO:0004568 |
| B8A3K0     |            |            |            |            |            |
| K7V5M7     |            |            |            |            |            |
| C0HFV7     | GO:0016787 |            |            |            |            |
| B4G1G1     |            |            |            |            |            |
| B4FTE1     | GO:0016021 | GO:0008233 | GO:0005787 | GO:0006465 |            |
| B6SIF0     | GO:0003676 | GO:0000166 |            |            |            |
| C0HFQ1     |            |            |            |            |            |
| B6SMK8     | GO:0004401 | GO:0046854 |            |            |            |
| K7V5N4     | GO:0004190 |            |            |            |            |
| Q7M1Z8     | GO:0045735 |            |            |            |            |
| B6T346     | GO:0003676 | GO:0000166 |            |            |            |
| A0A096QKY4 |            |            |            |            |            |
| Q8S4W8     | GO:0016831 | GO:0000287 | GO:0030976 |            |            |
| B4F9E8     |            |            |            |            |            |
| K7VTU7     | GO:0005576 | GO:0019953 |            |            |            |
| C0P451     | GO:0005975 | GO:0016998 | GO:0008061 | GO:0006032 | GO:0004568 |
| B6TRW7     | GO:0010223 |            |            |            |            |

GO:1901601

B4G1B0

B6SI37

Q8S532 GO:0016620

K7WCU4

K7U1M0 GO:0003885 GO:0050660 GO:0016020

B6TF92

B6SJE9

B6UGU4 GO:0016491

M8CBN1 GO:0007010 GO:0005829 GO:0006094 GO:0010498

A0A059PZ24 GO:0016021

B9RET0 GO:0030127 GO:0006888 GO:0006886 GO:0008270

B6TFC2 GO:0008430

B6UDH8

A0A096RTN1 GO:0006952 GO:0009607

B6SV64 GO:0005524

A0A096QRB1 GO:0005524 GO:0005737 GO:0016787 GO:0030163

B6STY9 GO:0009269

B6TLK8

B6T871 GO:0016829

B6UGS5 GO:0006950 GO:0009415

A0A096QQ54 GO:0046872 GO:0004222

C4J004 GO:0010223 GO:1901601

B6TXL1

B6TKN6

Q7XZQ2 GO:0003978 GO:0006012

A0A096TN72

B6SMY5

B6UHC9 GO:0016491



|            |            |            |            |            |            |            |
|------------|------------|------------|------------|------------|------------|------------|
| B6U8P6     |            |            |            |            |            |            |
| Q41886     | GO:0045735 |            |            |            |            |            |
| B6SK46     | GO:0045735 |            |            |            |            |            |
| C4J5L2     | GO:0016758 |            |            |            |            |            |
| B6TXJ8     | GO:0005975 | GO:0071555 | GO:0005576 | GO:0004650 |            |            |
| A0A096PME5 |            |            |            |            |            |            |
| B6UD26     | GO:0008171 |            |            |            |            |            |
| A0A096TH62 |            |            |            |            |            |            |
| Q4U168     | GO:0008878 | GO:0005978 |            |            |            |            |
| A0A0A7LS12 |            |            |            |            |            |            |
| X4Z319     | GO:0005524 |            |            |            |            |            |
| B8QY31     |            |            |            |            |            |            |
| C6F1K2     | GO:0005524 |            |            |            |            |            |
| Q10EF5     |            |            |            |            |            |            |
| B8A306     | GO:0005737 | GO:0006007 | GO:0030145 | GO:0004619 |            |            |
| B6TIG6     | GO:0010285 | GO:0009089 | GO:0030170 |            |            |            |
| Q9XFZ3     | GO:0050660 | GO:0016656 |            |            |            |            |
| B4FNW7     | GO:0001671 | GO:0006950 |            |            |            |            |
| P01088     | GO:0005576 | GO:0004867 |            |            |            |            |
| B4FS87     | GO:0051287 | GO:0050661 | GO:0006006 | GO:0016620 |            |            |
| C4J9Y2     |            |            |            |            |            |            |
| B6THH7     |            |            |            |            |            |            |
| B6SIG5     | GO:0006096 | GO:0004807 |            |            |            |            |
| B6T920     | GO:0003999 | GO:0006168 | GO:0005737 | GO:0009116 |            |            |
| A0A096TB53 | GO:0006950 |            |            |            |            |            |
| P55241     | GO:0005524 | GO:0009501 | GO:0009507 | GO:0008878 | GO:0005978 | GO:0019252 |
| Q9XFZ3     | GO:0050660 | GO:0016656 |            |            |            |            |
| B6THN2     | GO:0005524 | GO:0005737 | GO:0042026 |            |            |            |
| K7TNP5     | GO:0016282 | GO:0033290 | GO:0005852 | GO:0001731 | GO:0003743 |            |
| X1X262     | GO:0005524 |            |            |            |            |            |
| B9TSW1     | GO:0005524 | GO:0004356 | GO:0006542 |            |            |            |
| B6TF99     | GO:0005506 | GO:0016491 |            |            |            |            |
| Q1PBI2     |            |            |            |            |            |            |

|        |            |            |            |            |            |
|--------|------------|------------|------------|------------|------------|
| B8A367 | GO:0006535 | GO:0004124 | GO:0016740 |            |            |
| B8A230 |            |            |            |            |            |
| B6U607 |            |            |            |            |            |
| B6UAK0 | GO:0017057 | GO:0005975 | GO:0006098 |            |            |
| B6UB73 | GO:0020037 | GO:0004601 | GO:0006979 |            |            |
| C0PFK3 | GO:0005737 | GO:0005634 | GO:0019773 | GO:0004298 | GO:0006511 |
| B4FWD0 | GO:0010181 | GO:0045892 | GO:0016491 |            |            |
| Q9SM20 | GO:0004364 |            |            |            |            |
| B6SIF5 |            |            |            |            |            |
| B6SIF5 |            |            |            |            |            |
| B6T9H2 | GO:0016021 | GO:0003743 |            |            |            |
| B4FK49 | GO:0005524 | GO:0006241 | GO:0006183 | GO:0006228 | GO:0004550 |
| K7VVI6 | GO:0005524 | GO:0016301 | GO:0046872 | GO:0006090 | GO:0050242 |

**Supplementary Table S4: Classification of COG of 148 identified DEPs.**

| <b>Protein No</b>                               | <b>Accession</b> | <b>Protein Name</b>                                            | <b>Species</b>  |
|-------------------------------------------------|------------------|----------------------------------------------------------------|-----------------|
| <b>RNA processing and modification(A)</b>       |                  |                                                                |                 |
| 86                                              | B6T346_MAIZE     | THO complex subunit 4                                          | MAIZE           |
| 110                                             | B6SIP0_MAIZE     | NHP2-like protein 1                                            | MAIZE           |
| <b>Energy production and conversion(C)</b>      |                  |                                                                |                 |
| 20                                              | Q8S532_MAIZE     | Cytosolic aldehyde dehydrogenase RF2C                          | MAIZE           |
| 32                                              | E9NQE3_MAIZE     | Malate dehydrogenase                                           | MAIZE           |
| 53                                              | B6TXL1_MAIZE     | Mitochondrial NADH ubiquinone oxidoreductase 13kD-like subunit | MAIZE           |
| 55                                              | M7ZGS7_TRIUA     | Formamidase                                                    | Triticum urartu |
| 81                                              | Q5G1U0_MAIZE     | Malic enzyme                                                   | MAIZE           |
| 101                                             | Q6R987_MAIZE     | ATP synthase subunit alpha                                     | MAIZE           |
| 104                                             | K7U1M0_MAIZE     | L-gulonolactone oxidase                                        | MAIZE           |
| 116                                             | C4J5L2_MAIZE     | Glycosyltransferase                                            | MAIZE           |
| 128                                             | K7VVI6_MAIZE     | pyruvate, phosphate dikinase 1, Precursor                      | MAIZE           |
| 129                                             | K7VVI6_MAIZE     | pyruvate, phosphate dikinase 1, Precursor                      | MAIZE           |
| 135                                             | Q1PBI2_MAIZE     | L-galactose dehydrogenase                                      | MAIZE           |
| 140                                             | B6UB73_MAIZE     | APx1 - Cytosolic Ascorbate Peroxidase                          | MAIZE           |
| <b>Amino acid transport and metabolism(E)</b>   |                  |                                                                |                 |
| 44                                              | Q8S4W8_MAIZE     | Pyruvate decarboxylase                                         | MAIZE           |
| 67                                              | Q9AXG8_MAIZE     | Lipoxygenase                                                   | MAIZE           |
| 77                                              | C0PF66_MAIZE     | Aminoacylase-1                                                 | MAIZE           |
| 118                                             | B6TIG6_MAIZE     | transaminase/ transferase, transferring nitrogenous groups     | MAIZE           |
| 133                                             | B9TSW1_MAIZE     | glutamine synthetase                                           | MAIZE           |
| 136                                             | B8A367_MAIZE     | cysteine synthase1                                             | MAIZE           |
| <b>Nucleotide transport and metabolism(F)</b>   |                  |                                                                |                 |
| 49                                              | C0HFV7_MAIZE     | Putative apyrase family protein                                | MAIZE           |
| 126                                             | B6T920_MAIZE     | adenine phosphoribosyltransferase 1                            | MAIZE           |
| 147                                             | B4FK49_MAIZE     | nucleoside diphosphate kinase 1                                | MAIZE           |
| <b>Carbohydrate transport and metabolism(G)</b> |                  |                                                                |                 |
| 5                                               | Q7M1Z8_MAIZE     | Globulin-2                                                     | MAIZE           |
| 23                                              | C0P451_MAIZE     | Endochitinase B                                                | MAIZE           |
| 30                                              | Q9ZTQ4_MAIZE     | Cell wall invertase                                            | MAIZE           |

|     |                  |                                                       |       |
|-----|------------------|-------------------------------------------------------|-------|
| 36  | B6T871_MAIZE     | Lactoylglutathione lyase                              | MAIZE |
| 71  | A0A096SXV7_MAIZE | alpha-mannosidase                                     | MAIZE |
| 84  | B6SMK8_MAIZE     | Inositol-1-monophosphatase                            | MAIZE |
| 107 | B6T9E1_MAIZE     | Xyloglucan endotransglucosylase/hydrolase             | MAIZE |
| 113 | K7VTU7_MAIZE     | Uncharacterized protein                               | MAIZE |
| 117 | B8A306_MAIZE     | phosphoglycerate mutase1                              | MAIZE |
| 122 | B4FS87_MAIZE     | glyceraldehyde-3-phosphate dehydrogenase 2, cytosolic | MAIZE |
| 125 | B6SIG5_MAIZE     | triosephosphate isomerase, cytosolic                  | MAIZE |
| 139 | B6UAK0_MAIZE     | 6-phosphogluconolactonase                             | MAIZE |

#### **Lipid transport and metabolism (I)**

|     |              |                                       |       |
|-----|--------------|---------------------------------------|-------|
| 111 | P93852_MAIZE | Cycloartenol-C-24-methyltransferase 1 | MAIZE |
| 124 | B6THH7_MAIZE | isoamyl acetate-hydrolyzing esterase  | MAIZE |

#### **Translation, ribosomal structure and biogenesis (J)**

|     |              |                                                          |       |
|-----|--------------|----------------------------------------------------------|-------|
| 66  | B4FL64_MAIZE | Ribosomal protein L19                                    | MAIZE |
| 73  | B4FGK8_MAIZE | Eukaryotic translation initiation factor 2 alpha subunit | MAIZE |
| 93  | B6SX73_MAIZE | 60S ribosomal protein L35                                | MAIZE |
| 96  | B6UHJ9_MAIZE | 60S ribosomal protein L23a                               | MAIZE |
| 97  | B4FSQ4_MAIZE | 40S ribosomal protein SA                                 | MAIZE |
| 114 | Q9ZQX9_MAIZE | 40S ribosomal protein S27                                | MAIZE |
| 121 | K7TNP5_MAIZE | eukaryotic translation initiation factor 3 subunit 3     | MAIZE |
| 146 | B6T9H2_MAIZE | eukaryotic translation initiation factor 1A              | MAIZE |
| 34  | B6STY9_MAIZE | Salt tolerance protein                                   | MAIZE |
| 38  | B6U9I3_MAIZE | Eukaryotic translation initiation factor 3 subunit J     | MAIZE |
| 42  | K7UTW6_MAIZE | Plasminogen activator inhibitor 1 RNA-binding protein    | MAIZE |

#### **Transcription (K)**

|     |              |                                    |       |
|-----|--------------|------------------------------------|-------|
| 54  | K7V5M7_MAIZE | Uncharacterized protein            | MAIZE |
| 106 | B6SIF0_MAIZE | Glycine-rich RNA-binding protein 2 | MAIZE |

#### **Transcription, Replication, recombination and repair (L)**

|    |                  |                         |       |
|----|------------------|-------------------------|-------|
| 72 | A0A096PME5_MAIZE | Uncharacterized protein | MAIZE |
|----|------------------|-------------------------|-------|

#### **Cell wall/membrane/envelope biogenesis (M)**

|    |              |                                         |       |
|----|--------------|-----------------------------------------|-------|
| 13 | Q4U168_MAIZE | Glucose-1-phosphate adenylyltransferase | MAIZE |
| 39 | B4G1C2_MAIZE | Uncharacterized protein                 | MAIZE |
| 52 | SPSA_MAIZE   | Sucrose-phosphate synthase              | MAIZE |
| 64 | Q7XZQ2_MAIZE | UDP-glucose-4-epimerase                 | MAIZE |

|     |              |                                                         |       |
|-----|--------------|---------------------------------------------------------|-------|
| 69  | B6TXJ8_MAIZE | glycoside hydrolase, family 28                          | MAIZE |
| 98  | B6TA79_MAIZE | Cell division control protein 2                         | MAIZE |
| 115 | B6UD26_MAIZE | O-methyltransferase ZRP4                                | MAIZE |
| 131 | GLGL1_MAIZE  | glucose-1-phosphate adenylyltransferase large subunit 1 | MAIZE |
| 144 | B6SIF5_MAIZE | translationally-controlled tumor protein                | MAIZE |
| 145 | B6SIF5_MAIZE | translationally-controlled tumor protein                | MAIZE |

**Posttranslational modification, protein turnover, chaperones (O)**

|     |                  |                                                    |                              |
|-----|------------------|----------------------------------------------------|------------------------------|
| 4   | Q41815_MAIZE     | Heat shock protein 26                              | MAIZE                        |
| 6   | C6F1K2_ORYSJ     | Heat shock protein 70                              | Oryza sativa subsp. japonica |
| 9   | B6TLK8_MAIZE     | 17.4 kDa class I heat shock protein 3              | MAIZE                        |
| 16  | Q9S822_MAIZE     | Heat shock protein 101                             | MAIZE                        |
| 21  | C0P5U8_MAIZE     | Glutathione S-transferase                          | MAIZE                        |
| 24  | B6TSQ9_MAIZE     | Aspartic proteinase oryzasin-1                     | MAIZE                        |
| 28  | B6SJE9_MAIZE     | 17.5 kDa class II heat shock protein               | MAIZE                        |
| 31  | K7V5N4_MAIZE     | PREDICTED: aspartic proteinase nepenthesin-1-like  | MAIZE                        |
| 35  | B8A3K0_MAIZE     | GST6 protein                                       | MAIZE                        |
| 51  | B4F9E8_MAIZE     | class II heat shock protein                        | MAIZE                        |
| 57  | A0A096TAP2_MAIZE | Uncharacterized protein                            | MAIZE                        |
| 58  | K7VD78_MAIZE     | Putative chaperone clbp family protein             | MAIZE                        |
| 60  | B4FRD1_MAIZE     | Adaptin ear-binding coat-associated protein 1      | MAIZE                        |
| 61  | B6THJ5_MAIZE     | Phosphosulfolactate synthase-related protein       | MAIZE                        |
| 62  | Q41886_MAIZE     | 27kDa storage protein, zein                        | MAIZE                        |
| 82  | B6SV64_MAIZE     | Heat shock 70 kDa protein 4                        | MAIZE                        |
| 99  | A0A096QRB1_MAIZE | 26S protease regulatory subunit 4 homolog          | MAIZE                        |
| 100 | X4Z319_9POAL     | Hsp70                                              | Saccharum hybrid cultivar    |
| 103 | B4F848_MAIZE     | Chaperonin                                         | MAIZE                        |
| 109 | A0A096QQ54_MAIZE | Uncharacterized protein                            | MAIZE                        |
| 120 | B4FNW7_MAIZE     | activator of 90 kDa heat shock protein ATPase      | MAIZE                        |
| 130 | B6THN2_MAIZE     | ruBisCO large subunit-binding protein subunit beta | MAIZE                        |
| 141 | C0PFK3_MAIZE     | proteasome subunit alpha type                      | MAIZE                        |
| 143 | Q9SM20_MAIZE     | glutathione transferase III(b)                     | MAIZE                        |

**Inorganic ion transport and metabolism (P)**

|     |              |                                          |                                     |
|-----|--------------|------------------------------------------|-------------------------------------|
| 45  | B6TFC2_MAIZE | Selenium-binding protein                 | MAIZE                               |
| 119 | Q9XFZ3_ORYSJ | cytosolic monodehydroascorbate reductase | Oryza sativa subsp. japonica (Rice) |

**Secondary metabolites biosynthesis, transport, and catabolism (Q)**

|     |                  |                                  |       |
|-----|------------------|----------------------------------|-------|
| 17  | B6UGU4_MAIZE     | Steroleosin                      | MAIZE |
| 25  | B6SSB8_MAIZE     | Transposon protein               | MAIZE |
| 59  | B6UHC9_MAIZE     | Putative uncharacterized protein | MAIZE |
| 91  | B4FU39_MAIZE     | Uncharacterized protein          | MAIZE |
| 112 | A0A096RS97_MAIZE | Uncharacterized protein          | MAIZE |
| 134 | B6TF99_MAIZE     | gibberellin 20 oxidase 2         | MAIZE |
| 138 | B6U607_MAIZE     | carbonyl reductase 1             | MAIZE |

**General function prediction only (R)**

|    |              |                                           |       |
|----|--------------|-------------------------------------------|-------|
| 68 | B6TRW7_MAIZE | Sigma factor sigB regulation protein rsbQ | MAIZE |
|----|--------------|-------------------------------------------|-------|

**Signal transduction mechanisms(T)**

|     |                  |                                                     |       |
|-----|------------------|-----------------------------------------------------|-------|
| 46  | B6TII3_MAIZE     | ADP-ribosylation factor GTPase-activating protein 3 | MAIZE |
| 70  | B6TA85_MAIZE     | Protein binding protein                             | MAIZE |
| 89  | Q32SG1_MAIZE     | Protein phosphatase 2A regulatory subunit B'        | MAIZE |
| 92  | K7UYP8_MAIZE     | Basic endochitinase A                               | MAIZE |
| 127 | A0A096TB53_MAIZE | USP family protein                                  | MAIZE |

**Intracellular trafficking, secretion, and vesicular transport (U)**

|     |                  |                                                  |                              |
|-----|------------------|--------------------------------------------------|------------------------------|
| 33  | B6UGN9_MAIZE     | Oleosin                                          | MAIZE                        |
| 41  | B6TTP4_MAIZE     | Stress-inducible membrane pore protein           | MAIZE                        |
| 47  | B6TKN6_MAIZE     | Nonspecific lipid-transfer protein               | MAIZE                        |
| 74  | A0A096QF11_MAIZE | Uncharacterized protein                          | MAIZE                        |
| 75  | M8CBN1_AEGTA     | Importin-4                                       | Aegilops tauschii            |
| 76  | Q10EF5_ORYSJ     | HEAT repeat family protein, expressed            | Oryza sativa subsp. Japonica |
| 80  | B4FSU1_MAIZE     | Transmembrane emp24 domain-containing protein 10 | MAIZE                        |
| 87  | K7TNE7_MAIZE     | Uncharacterized protein                          | MAIZE                        |
| 90  | B4FBP3_MAIZE     | Signal recognition particle subunit SRP68        | MAIZE                        |
| 95  | B9RET0_RICCO     | Protein transport protein Sec24C                 | Sorghum bicolor              |
| 108 | B4FTE1_MAIZE     | Signal peptidase complex subunit 2               | MAIZE                        |

**Nuclear structure (Y)**

|     |              |                        |       |
|-----|--------------|------------------------|-------|
| 142 | B4FWD0_MAIZE | minor allergen Alt a 7 | MAIZE |
|-----|--------------|------------------------|-------|

**Cytoskeleton (Z)**

|     |              |                         |                    |
|-----|--------------|-------------------------|--------------------|
| 132 | X1X262_ACYPI | actin related protein 1 | Acyrtosiphon pisum |
|-----|--------------|-------------------------|--------------------|

**Function unknown (S)**

|   |              |               |       |
|---|--------------|---------------|-------|
| 1 | A3KLI1_MAIZE | RAB17 protein | MAIZE |
|---|--------------|---------------|-------|

|     |                  |                                                |                                |
|-----|------------------|------------------------------------------------|--------------------------------|
| 2   | B6SI37_MAIZE     | Embryonic abundant protein                     | MAIZE                          |
| 3   | GLB1_MAIZE       | Globulin-1 S allele                            | MAIZE                          |
| 7   | B8QY31_ZEAMP     | Zeamatin-like protein                          | ZEAMP                          |
| 8   | B6SLF6_MAIZE     | Antimicrobial peptide MBP-1                    | MAIZE                          |
| 10  | B6T8E4_MAIZE     | Embryonic abundant protein 1                   | MAIZE                          |
| 11  | B6SQM6_MAIZE     | Pathogenesis protein 10                        | MAIZE                          |
| 12  | K7W272_MAIZE     | PREDICTED: globulin-1 S allele-like            | MAIZE                          |
| 14  | A0A096TN72_MAIZE | PREDICTED: embryonic protein DC-8-like         | MAIZE                          |
| 15  | A0A059PZ24_9POAL | Caleosin                                       | Saccharum hybrid cultivar R570 |
| 18  | B6UGS5_MAIZE     | Putative uncharacterized protein               | MAIZE                          |
| 19  | B4FFZ9_MAIZE     | Lipoprotein                                    | MAIZE                          |
| 22  | B6SK46_MAIZE     | Cupin family protein                           | MAIZE                          |
| 26  | K7WCU4_MAIZE     | Uncharacterized protein                        | MAIZE                          |
| 27  | Q94J20_ORYSJ     | Lipoprotein-like                               | Oryza sativa subsp. Japonica   |
| 29  | Q19VG6_MAIZE     | Major latex protein 22                         | MAIZE                          |
| 37  | A0A096RTN1_MAIZE | PREDICTED: pathogenesis-related protein 1-like | MAIZE                          |
| 40  | B6SGN7_MAIZE     | Embryonic protein DC-8                         | MAIZE                          |
| 43  | B6UDH8_MAIZE     | Putative uncharacterized protein               | MAIZE                          |
| 48  | B6TF92_MAIZE     | Stress responsive protein                      | MAIZE                          |
| 50  | B8A0H4_MAIZE     | Uncharacterized protein                        | MAIZE                          |
| 56  | C0HFQ1_MAIZE     | Uncharacterized protein                        | MAIZE                          |
| 63  | A0A096TH62_MAIZE | Uncharacterized protein                        | MAIZE                          |
| 65  | A0A096QKY4_MAIZE | Uncharacterized protein                        | MAIZE                          |
| 78  | B4F922_MAIZE     | Acyltransferase                                | MAIZE                          |
| 79  | B6U8P6_MAIZE     | ABA-responsive protein                         | MAIZE                          |
| 83  | B4G1G1_MAIZE     | Desiccation-related protein PCC13-62           | MAIZE                          |
| 85  | A0A0A7LS12_SETIT | Up-frame shift 3 factor                        | Setaria italica                |
| 88  | B4G1B0_MAIZE     | Remorin                                        | MAIZE                          |
| 94  | B4F957_MAIZE     | pro-resilin                                    | MAIZE                          |
| 102 | B6SMY5_MAIZE     | Putative uncharacterized protein               | MAIZE                          |
| 105 | B6T6D7_MAIZE     | MIR-interacting saposin-like protein           | MAIZE                          |
| 123 | C4J9Y2_MAIZE     | uncharacterized protein LOC100502283           | MAIZE                          |
| 137 | B8A230_MAIZE     | unknown                                        | MAIZE                          |
| 148 | ITRF_MAIZE       | trypsin/factor XIIIa inhibitor                 | MAIZE                          |

**Supplementary Table S5: KEGG pathway enrichment of identified DEPS.**

| Pathway                                    | Seqs in Pathway | Enzyme                            | Ezyme ID         | Seqs of Enzyme | Seqs                   |
|--------------------------------------------|-----------------|-----------------------------------|------------------|----------------|------------------------|
| Chloroalkane and chloroalkene degradation  | 1               | dehydrogenase (NAD <sup>+</sup> ) | ec:1.2.1.3       | 1              | tr Q8S532 Q8S532_MAIZE |
| Phenylpropanoid biosynthesis               | 1               | dehydrogenase                     | ec:1.1.1.19<br>5 | 1              | tr B4FU39 B4FU39_MAIZE |
| Glycolysis / Gluconeogenesis               | 1               | dehydrogenase (NAD <sup>+</sup> ) | ec:1.2.1.3       | 1              | tr Q8S532 Q8S532_MAIZE |
| Arginine and proline metabolism            | 1               | dehydrogenase (NAD <sup>+</sup> ) | ec:1.2.1.3       | 1              | tr Q8S532 Q8S532_MAIZE |
| Methane metabolism                         | 1               | dehydrogenase                     | ec:1.1.1.37      | 1              | tr E9NQE3 E9NQE3_MAIZE |
| Fatty acid degradation                     | 1               | dehydrogenase (NAD <sup>+</sup> ) | ec:1.2.1.3       | 1              | tr Q8S532 Q8S532_MAIZE |
| Streptomycin biosynthesis                  | 1               | phosphatase                       | ec:3.1.3.25      | 1              | tr B6SMK8 B6SMK8_MAIZE |
| Purine metabolism                          | 1               | adenylpyrophosphatase             | ec:3.6.1.3       | 1              | tr Q6R987 Q6R987_MAIZE |
| Purine metabolism                          | 1               | phosphatase                       | ec:3.6.1.15      | 1              | tr Q6R987 Q6R987_MAIZE |
| Steroid biosynthesis                       | 1               | 24-C-methyltransferase            | ec:2.1.1.41      | 1              | tr P93852 P93852_MAIZE |
| Limonene and pinene degradation            | 1               | dehydrogenase (NAD <sup>+</sup> ) | ec:1.2.1.3       | 1              | tr Q8S532 Q8S532_MAIZE |
| T cell receptor signaling pathway          | 1               | phosphatase                       | ec:3.1.3.16      | 1              | tr K7V5M7 K7V5M7_MAIZE |
| Tryptophan metabolism                      | 1               | dehydrogenase (NAD <sup>+</sup> ) | ec:1.2.1.3       | 1              | tr Q8S532 Q8S532_MAIZE |
| Arginine biosynthesis                      | 1               | acid amidohydrolase               | ec:3.5.1.14      | 1              | tr C0PF66 C0PF66_MAIZE |
| Valine, leucine and isoleucine degradation | 1               | dehydrogenase (NAD <sup>+</sup> ) | ec:1.2.1.3       | 1              | tr Q8S532 Q8S532_MAIZE |
| Thiamine metabolism                        | 1               | phosphatase                       | ec:3.6.1.15      | 1              | tr Q6R987 Q6R987_MAIZE |
| beta-Alanine metabolism                    | 1               | dehydrogenase (NAD <sup>+</sup> ) | ec:1.2.1.3       | 1              | tr Q8S532 Q8S532_MAIZE |
| Glyoxylate and dicarboxylate metabolism    | 1               | dehydrogenase                     | ec:1.1.1.37      | 1              | tr E9NQE3 E9NQE3_MAIZE |
| Lysine degradation                         | 1               | dehydrogenase (NAD <sup>+</sup> ) | ec:1.2.1.3       | 1              | tr Q8S532 Q8S532_MAIZE |
| Ascorbate and aldarate metabolism          | 1               | dehydrogenase (NAD <sup>+</sup> ) | ec:1.2.1.3       | 1              | tr Q8S532 Q8S532_MAIZE |
| Citrate cycle (TCA cycle)                  | 1               | dehydrogenase                     | ec:1.1.1.37      | 1              | tr E9NQE3 E9NQE3_MAIZE |
| Phosphatidylinositol signaling system      | 1               | phosphatase                       | ec:3.1.3.25      | 1              | tr B6SMK8 B6SMK8_MAIZE |
| Inositol phosphate metabolism              | 1               | phosphatase                       | ec:3.1.3.25      | 1              | tr B6SMK8 B6SMK8_MAIZE |
| Glycerolipid metabolism                    | 1               | dehydrogenase (NAD <sup>+</sup> ) | ec:1.2.1.3       | 1              | tr Q8S532 Q8S532_MAIZE |
| Cysteine and methionine metabolism         | 1               | dehydrogenase                     | ec:1.1.1.37      | 1              | tr E9NQE3 E9NQE3_MAIZE |
| Carbon fixation pathways in prokaryotes    | 1               | dehydrogenase                     | ec:1.1.1.37      | 1              | tr E9NQE3 E9NQE3_MAIZE |



|                                              |   |                                            |             |   |                                                |
|----------------------------------------------|---|--------------------------------------------|-------------|---|------------------------------------------------|
| Aminobenzoate degradation                    | 2 | nitrophenyl phosphatase                    | ec:3.1.3.41 | 2 | tr B6SMK8 B6SMK8_MAIZE, tr K7V5M7 K7V5M7_MAIZE |
| Pentose and glucuronate interconversions     | 2 | dehydrogenase (NAD+)                       | ec:1.2.1.3  | 1 | tr Q8S532 Q8S532_MAIZE                         |
| Pentose and glucuronate interconversions     | 2 | pectin depolymerase                        | ec:3.2.1.15 | 1 | tr B6TXJ8 B6TXJ8_MAIZE                         |
| Carbon fixation in photosynthetic organisms  | 2 | dehydrogenase                              | ec:1.1.1.37 | 1 | tr E9NQE3 E9NQE3_MAIZE                         |
| Carbon fixation in photosynthetic organisms  | 2 | dehydrogenase (decarboxylating)            | ec:1.1.1.39 | 1 | tr Q5G1U0 Q5G1U0_MAIZE                         |
| Glutathione metabolism                       | 2 | transferase                                | ec:2.5.1.18 | 2 | tr B8A3K0 B8A3K0_MAIZE, tr C0P5U8 C0P5U8_MAIZE |
| Drug metabolism - cytochrome P450            | 2 | transferase                                | ec:2.5.1.18 | 2 | tr B8A3K0 B8A3K0_MAIZE, tr C0P5U8 C0P5U8_MAIZE |
| Histidine metabolism                         | 2 | histidinol phosphate phosphatase           | ec:3.1.3.15 | 1 | tr B6SMK8 B6SMK8_MAIZE                         |
| Histidine metabolism                         | 2 | dehydrogenase (NAD+)                       | ec:1.2.1.3  | 1 | tr Q8S532 Q8S532_MAIZE                         |
| Metabolism of xenobiotics by cytochrome P450 | 2 | transferase                                | ec:2.5.1.18 | 2 | tr B8A3K0 B8A3K0_MAIZE, tr C0P5U8 C0P5U8_MAIZE |
| Galactose metabolism                         | 2 | 4-epimerase                                | ec:5.1.3.2  | 1 | tr Q7XZQ2 Q7XZQ2_MAIZE                         |
| Galactose metabolism                         | 2 | invertase                                  | ec:3.2.1.26 | 1 | tr Q9ZTQ4 Q9ZTQ4_MAIZE                         |
| Starch and sucrose metabolism                | 2 | invertase                                  | ec:3.2.1.26 | 1 | tr Q9ZTQ4 Q9ZTQ4_MAIZE                         |
| Starch and sucrose metabolism                | 2 | alpha-glucosidase                          | ec:3.2.1.48 | 1 | tr Q9ZTQ4 Q9ZTQ4_MAIZE                         |
| Starch and sucrose metabolism                | 2 | pectin depolymerase                        | ec:3.2.1.15 | 1 | tr B6TXJ8 B6TXJ8_MAIZE                         |
| Pyruvate metabolism                          | 3 | dehydrogenase                              | ec:1.1.1.37 | 1 | tr E9NQE3 E9NQE3_MAIZE                         |
| Pyruvate metabolism                          | 3 | dehydrogenase (decarboxylating)            | ec:1.1.1.39 | 1 | tr Q5G1U0 Q5G1U0_MAIZE                         |
| Pyruvate metabolism                          | 3 | dehydrogenase oxaloacetate-decarboxylating | ec:1.1.1.38 | 1 | tr Q5G1U0 Q5G1U0_MAIZE                         |
| Pyruvate metabolism                          | 3 | dehydrogenase (NAD+)                       | ec:1.2.1.3  | 1 | tr Q8S532 Q8S532_MAIZE                         |
| Amino sugar and nucleotide sugar metabolism  | 4 | 4-epimerase                                | ec:5.1.3.2  | 1 | tr Q7XZQ2 Q7XZQ2_MAIZE                         |
| Amino sugar and nucleotide sugar metabolism  | 4 | chitodextrinase                            | ec:3.2.1.14 | 3 | tr B4G1C2 B4G1C2_MAIZE, tr C0P451 C0P451_MAIZE |
| Biosynthesis of antibiotics                  | 5 | dehydrogenase                              | ec:1.1.1.37 | 1 | tr E9NQE3 E9NQE3_MAIZE                         |
| Biosynthesis of antibiotics                  | 5 | phosphatase                                | ec:3.1.3.25 | 1 | tr B6SMK8 B6SMK8_MAIZE                         |
| Biosynthesis of antibiotics                  | 5 | 24-C-methyltransferase                     | ec:2.1.1.41 | 1 | tr P93852 P93852_MAIZE                         |
| Biosynthesis of antibiotics                  | 5 | dehydrogenase (NAD+)                       | ec:1.2.1.3  | 1 | tr Q8S532 Q8S532_MAIZE                         |
| Biosynthesis of antibiotics                  | 5 | acid amidohydrolase                        | ec:3.5.1.14 | 1 | tr C0PF66 C0PF66_MAIZE                         |

**Supplementary Table S6: Primers used in qRT-PCR**

| <b>Protein No.</b> | <b>Primer pairs (5'--3')</b>                                        |
|--------------------|---------------------------------------------------------------------|
| 1                  | F: 5'-ACCAGTACGGCAACCCAGTC-3'<br>R: 5'-TTAAACACGAAACCCACGGA-3'      |
| 2                  | F: 5'-TACAGCGAGATGGGGAAGAA-3'<br>R: 5'-CGTGAAACAGGCTACCAAACACTAC-3' |
| 3                  | F: 5'-CGTTCGTTCAAGATCGCCTAC-3'<br>R: 5'-CACCTTCTCGTTCCTGTCGG-3'     |
| 4                  | F: 5'-CGCAGGAGAACAGGGACAA-3'<br>R: 5'-GGCGACATCGGGTCAACTA-3'        |
| 5                  | F: 5'-ACAAGAAGCCGACCCATTCC-3'<br>R: 5'-TCCTCGACTTTTGCCCACC-3'       |
| 6                  | F: 5'-GCGAGCGAATCAGAAGAGCA-3'<br>R: 5'-TCAAAGACGGTGTGGTGGG-3'       |
| 7                  | F: 5'-ACTTCTTCGACATCTCCCTCATC-3'<br>R: 5'-TGCTGGTGGCGTCATCCTT-3'    |
| 8                  | F: 5'-GCCATCTCCTCACCCTCGTT-3'<br>R: 5'-CCTTTCCGTACTGCCACTCG-3'      |
| 9                  | F: 5'-GCCAAGAAGCCTGAAGTGAAG-3'<br>R: 5'-AAGTAGACCCAACATACGCAAAG-3'  |
| 10                 | F: 5'-AGGAAAGCAGGGAGGAGCTG-3'<br>R: 5'-GGACTTGGTCCTGAACTTGGA-3'     |
| 11                 | F: 5'-TGCGTCGCCAAGGTCAA-3'<br>R: 5'-CCAATCACAACGTCGGTCT-3'          |
| 12                 | F: 5'-AACTTTGAGCAGGGGAGCAT-3'<br>R: 5'-GCGGTGTCTTGGCAGACTTG-3'      |
| 13                 | F: 5'-GACACGAACTCAGGTCCTCACC-3'<br>R: 5'-CCGCCAAAATGATAGCAGAT-3'    |
| 14                 | F: 5'-CACTAGCGTCGAGCCATTACA-3'<br>R: 5'-TCTCCTGATACGGGACCACAG-3'    |
| 15                 | F: 5'-GACCTCTACGGCTGGATTGC-3'<br>R: 5'-GTTCACTTGGCTTCCATTTTCAT-3'   |
| 16                 | F: 5'-TGAGACGGGGATGAAGTCG-3'<br>R: 5'-ACAAACAGCAGCGTTACAAGAA-3'     |

17 F: 5'- GCGTCCATCTGGCAAGTGT-3'  
R: 5'- TCCATCCTCAGGGTGTGTA-3'  
F: 5'- CTTGTCTATTGCCCTTCGGAGTT-3'  
86 R: 5'- CCGCCAAGATTGATGCTAAAA-3'  
F: 5'- CCTCACTACAGGGAACAGCG-3'  
87 R: 5'- CTTGAAGATGATGGAAGTATGGG-3'  
F: 5'- ACACCGAGCAGAAAGTGAGAAAC-3'  
88 R: 5'- TGTCAACAACAACGAAAACAACAG-3'  
F: 5'- GCCGCTTCAGCATTTCG-3'  
89 R: 5'- GCCTCTTTATCTCCTTCTCCTTTAT-3'  
F: 5'- GTACAAACGCAAAACAACGC-3'  
90 R: 5'- CAATCATAGGCTCCACTTCG-3'  
F: 5'- CCCCGTTCCATTTCAATTATCC-3'  
91 R: 5'- CGTGACATCGTCGTCTTTAGG-3'  
F: 5'- ATCGGCTACGGGAGCAATCT-3'  
92 R: 5'- TTCAAACCGACGAAGCAACAC-3'  
F: 5'- TCTCGCAGAAGCAGAAGTCG-3'  
93 R: 5'- CAGCAAATGTCCATACAAACCA-3'  
F: 5'- GGCGGACGACTTCGATGAGT-3'  
94 R: 5'- CGAGCACGGGTAGCAGGTTT-3'  
F: 5'- TCTACTGGCGGAAACTTCTTG-3'  
95 R: 5'- CCACCTGTAGTCTGAGGCACAA-3'  
F: 5'- ATCAGCACTACCGGAAGGAAC-3'  
96 R: 5'- GCATCATAGTCGGGAGTCAGC-3'  
F: 5'- CCAGCGTGCTGTCCTCAAGT-3'  
97 R: 5'- AAGGCAATGGTCGGGATGTT-3'  
F: 5'- TGGTCTGTGGGCTGTATCTTTG-3'  
98 R: 5'- TCTTTTGCTTGGCTCGTATCG-3'  
F: 5'- TGTGGCTAACTCAACATCTGCG-3'  
99 R: 5'- CCAACAGCGTCAATCTCATCAATAA-3'  
F: 5'- GTTCAGGGGACAACAAACCTTATG-3'  
100 R: 5'- AACCAGCCTACAGCGGAGAAA-3'  
F: 5'- AATACCGATACCTGTCAGATTCCA-3'  
101 R: 5'- GTGTTCAAGCAGTGCGTCCA-3'

102 F: 5'- GACGAGGCCGAGAAGGAGAT-3'  
R: 5'- TGA CTGACGAAAGGAACTAATACG-3'

103 F: 5'- CTCTGGGAGATAGGGTGCTTGT-3'  
R: 5'- ATTTTCTTGTCCCCGATGGTC-3'

104 F: 5'- CTAGCTGACCAATTCGACACGA-3'  
R: 5'- AGGAGGAGCAAGACGAGGGA-3'

105 F: 5'- CATCTGTAAAACGACCACCCC-3'  
R: 5'- ATGACCTTCCCCTCCCTCTG-3'

106 F: 5'- TCCTTTTCCTTTCATAAACCCC-3'  
R: 5'- TCACCCTCGCTTCAGTAACCT-3'

107 F: 5'- AGCTATCCAGTGGAGACGAAGAT-3'  
R: 5'- CTGCGACGACAGGTAGAAGG-3'

108 F: 5'- AAAGGAAGGAGTTCTTGTGGAGG -3'  
R: 5'- GTTTCTAGGATTCGGACGGATAGT-3'

109 F: 5'- ATTTTATGCCAGCGAGAAGTATCC-3'  
R: 5'- CATCCTCCAGCCATCAGACAAC-3'

110 F: 5'- CATCCTCCAGCCATCAGACAAC-3'  
R: 5'- AGACACCATCACCAGTCCAAGC-3'

111 F: 5'- TTTTAGATGTGGGCTGTGGAATAG-3'  
R: 5'- TCTCCTTGTAGCAACCAACTGGA-3'

112 F: 5'- GTCCTCAACGTCAACCACTACC-3'  
R: 5'- TCAACGCTCTTCAGCAATCC-3'

113 F: 5'- GCCTCCGTTCTCGTCAATG-3'  
R: 5'- TCCAAGCCGTTCCAGTTGC-3'

114 F: 5'- CCAGTCGCCCAACTCCTTCT-3'  
R: 5'- TCAGTGAGCCTTGCCTTTCCT-3'

115 F: 5'-GGGAGTTCAGGGACTTGTTTCG-3'  
R: 5'- GGTGGCAATGATCTTGGGAG-3'

116 F: 5'-TCTTCGCCGAGCAGTTTATC-3'  
R: 5'- TTCGCCACTTGTTCCATAACC-3'

117 F: 5'- GGTGTCCACTCCCGTCTTGA-3'  
R: 5'- TTGAATTTGTAGGGTGCTTCTCC-3'

118 F: 5'- CATCTCGGGACCAACTAACCAA-3'  
R: 5'- ACACCTGTGAACCCAGCGTATT-3'

119 F: 5'- CAAGTTCGGCTCGTACTGGATT-3'  
R: 5'- GAACCTTCACGATGACACGGA-3'

120 F: 5'- CAGGAAGGAAA ACTGATTGCG-3'

R: 5'- AACTGGGTGAGAAACATGGATTG-3'  
121 F: 5'- AGGAGAACATGGCAAGAAAAGC-3'  
R: 5'- TGTCGAAATTCTGACCAGCAAC-3'  
122 F: 5'-GGCTGGTGCTGAGTATGTCGTG-3'  
R: 5'- TGAGGGTCCATCAACAGTCTTCT-3'  
123 F: 5'- CTACGAGAACCCCAAGCACAA-3'  
R: 5'- GCCACTATGTTACACCACCATCC-3'  
124 F: 5'- CTACGAGAACCCCAAGCACAA-3'  
R: 5'- GCCACTATGTTACACCACCATCC-3'  
125 F: 5'- CCTGGGTCATTCTTGGACACTC-3'  
R: 5'- CCAATAGCCCAAACCTGGTTCATA-3'  
126 F: 5'- TCCGTGACACCATCGACCTC-3'  
R: 5'- GGCAACTTCTTCGGCTTCCT-3'  
127 F: 5'- TCAAGGAGCCCGACTACGAG-3'  
R: 5'- CAGGATGTCCAAGGTTTCTATGTC-3'

---
